# Supplementary material
Source: Springer Nature journal article supplement (https://www.springermedizin.de/resource/supplementary/12876_2010_564_MOESM4_ESM.pdf/9437258)
Supplement: MOESM4 [file 9437258]

# Bootstrap

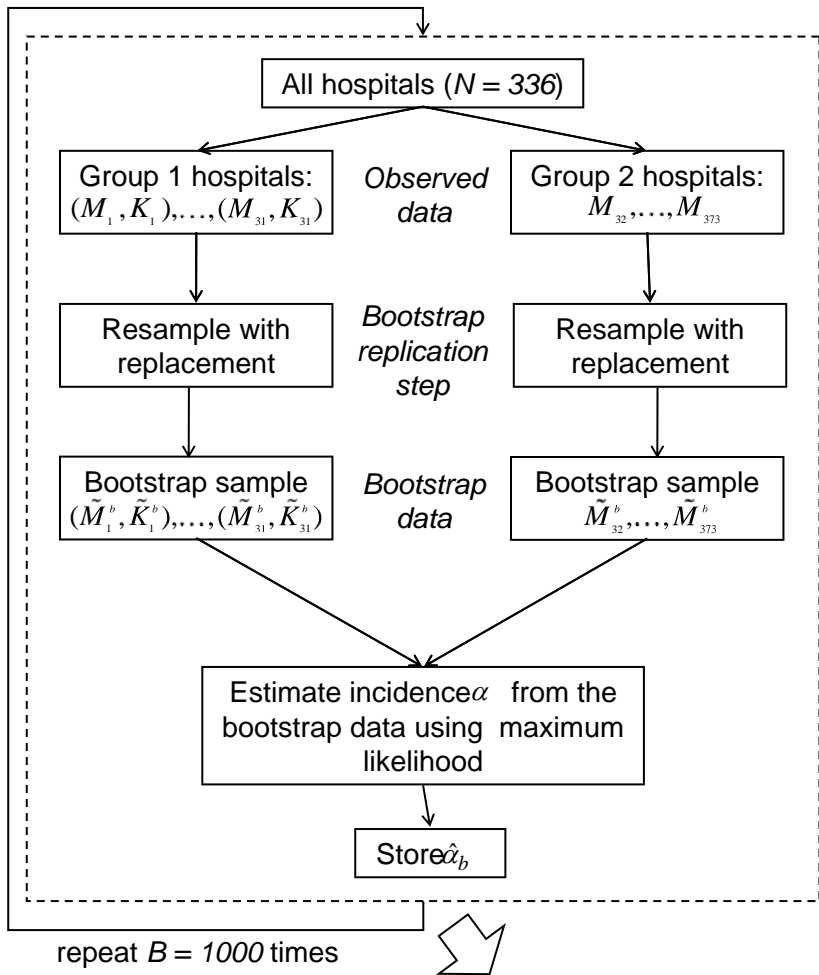

Estimate the distribution of  $\hat{\alpha}$  ( $\Rightarrow$  confidence intervals) from  $\hat{\alpha}_1, \dots, \hat{\alpha}_B$
